# Supplementary material for: Percutaneous Needle Electrolysis Reverses Neurographic Signs of Nerve Entrapment by Induced Fibrosis in Mice
Source: Hindawi journal article supplement (doi:10.1155/2020/6615563), 2020-01-01
Supplement: f1 [file 6615563.f1.pdf]

**FIGURE 3A****% variation of amplitude of CMAPs with respect to control**

|                | <b>MEAN</b> | <b>SEM</b> | <b>N</b> |
|----------------|-------------|------------|----------|
| <b>Group 1</b> | 53,30       | 1,49       | 10       |
| <b>Group 2</b> | 89,20       | 4,68       | 10       |
| <b>Group 3</b> | 95,70       | 7,18       | 10       |
| <b>Group 4</b> | 67,80       | 3,98       | 10       |
| <b>Group 5</b> | 65,40       | 6,68       | 10       |

**FIGURE 3B****% variation of proximal latency respect to control**

|                | <b>MEAN</b> | <b>SEM</b> | <b>N</b> |
|----------------|-------------|------------|----------|
| <b>Group 1</b> | 114,67      | 4,65       | 10       |
| <b>Group 2</b> | 111,75      | 3,73       | 10       |
| <b>Group 3</b> | 105,90      | 1,87       | 10       |
| <b>Group 4</b> | 117,75      | 2,02       | 10       |
| <b>Group 5</b> | 119,75      | 1,36       | 10       |
